# Supplementary material for: Inhibition of 11β-hydroxysteroid dehydrogenase 1 alleviates pulmonary fibrosis through inhibition of endothelial-to-mesenchymal transition and M2 macrophage polarization by upregulating heme oxygenase-1
Source: Springer Nature journal article supplement (doi:10.1038/s41419-025-07522-2), 2025-03-21

**Fig 1C.**

Full and uncropped western blot for Figure 1C

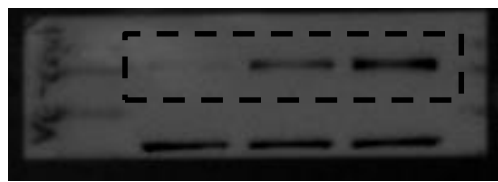

VE-cadherin

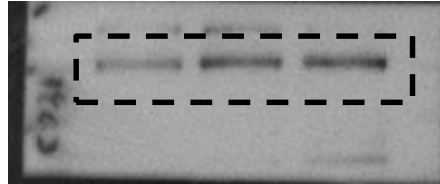

CD31

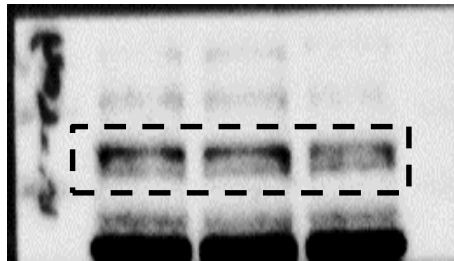

N-cadherin

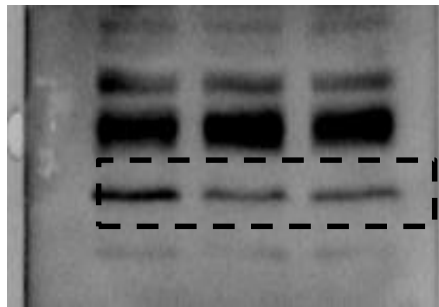

Snail

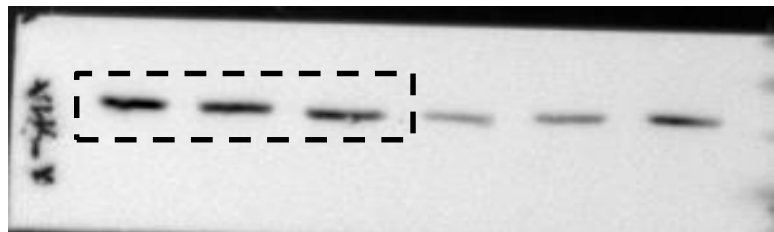

$\beta$ -actin

**Fig 1E.**

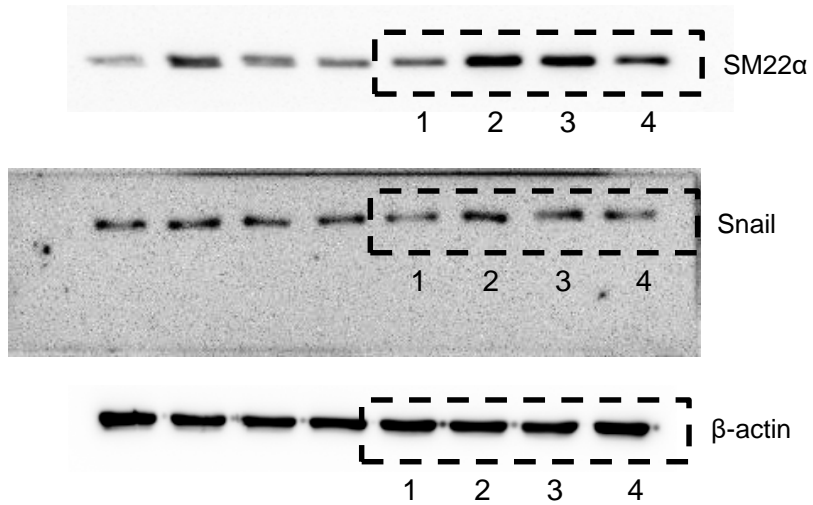

**Fig 1F.**

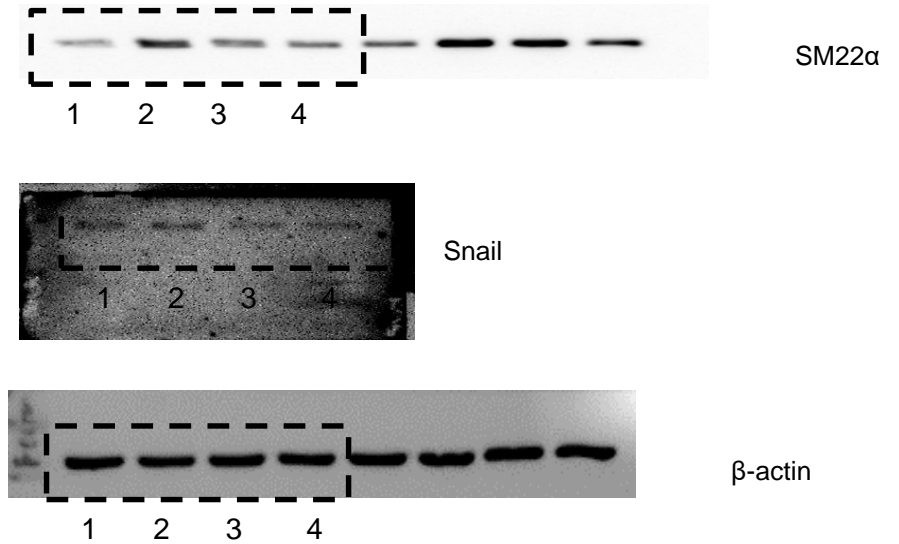

**Fig 1H.**

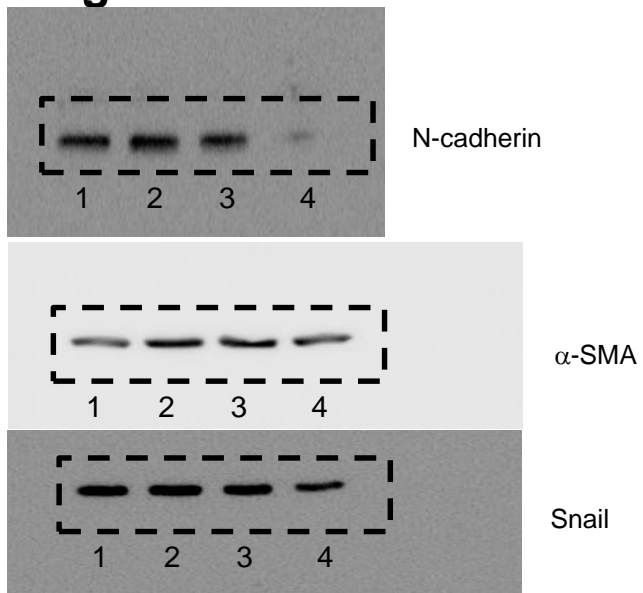

**Fig 1I.**

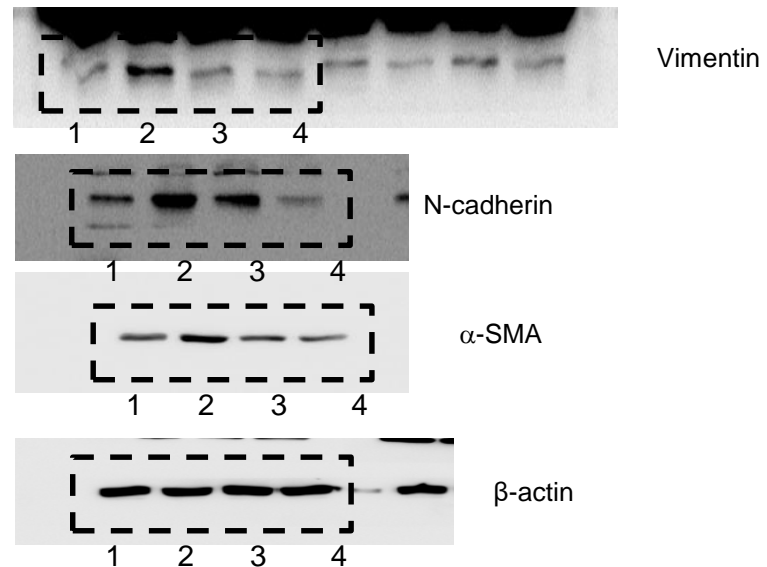

**Fig 2B.**

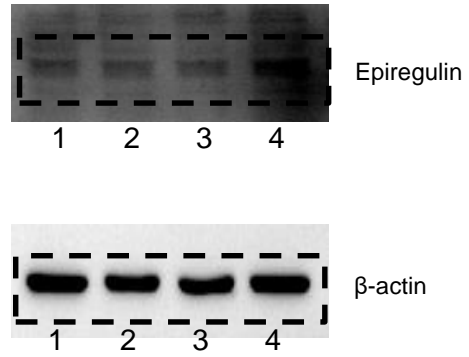

**Fig 3C.**

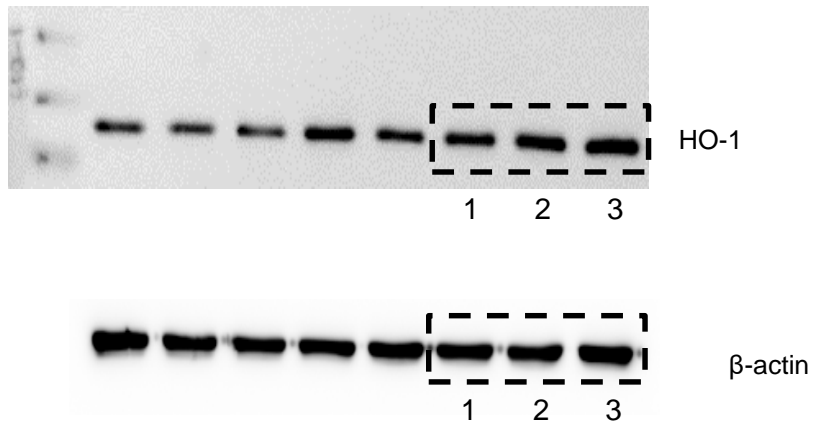

**Fig 3D.**

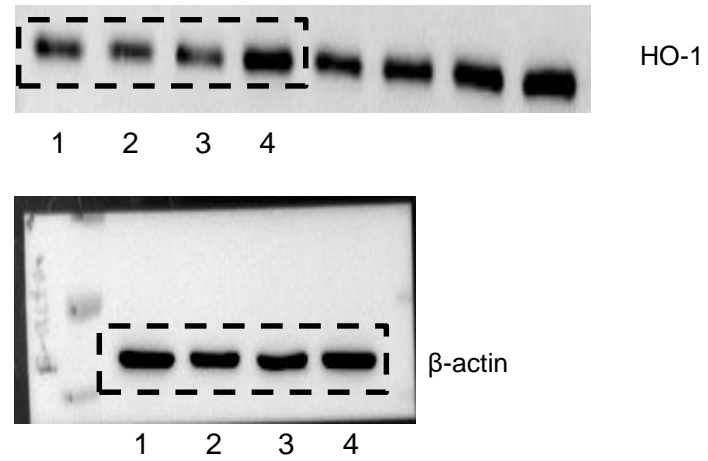

**Fig 3F.**

Full and uncropped western blot for Figure 3F, H

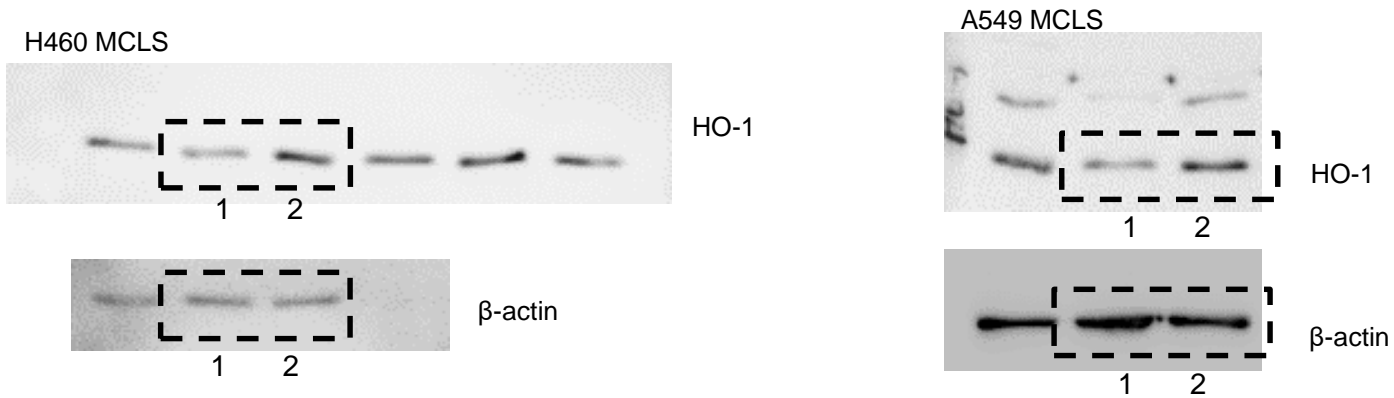

**Fig 3H.**

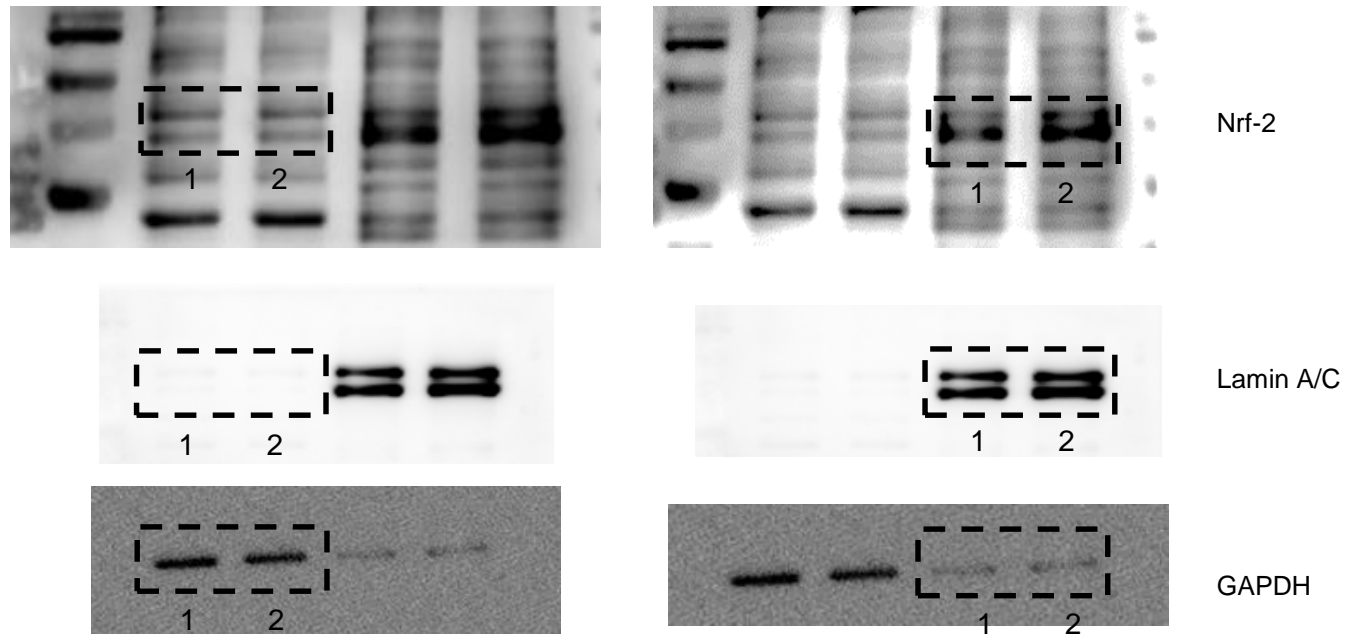

**Fig 3I.**

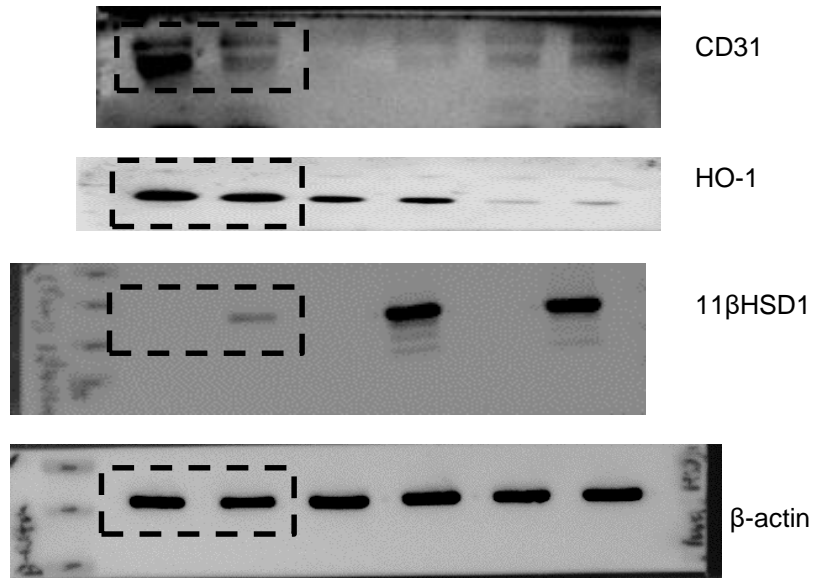

**Fig 3J.**

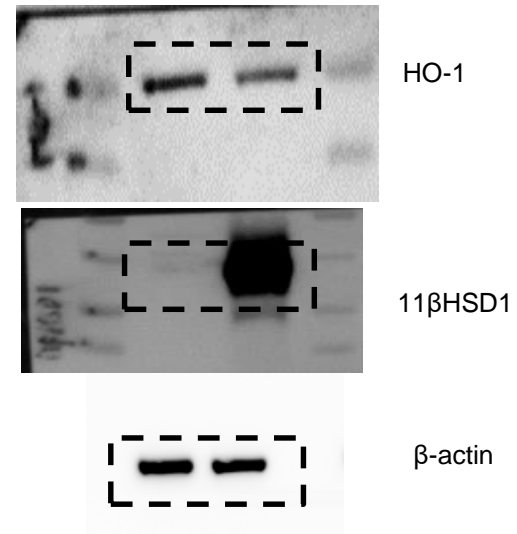

**Fig 4C.**

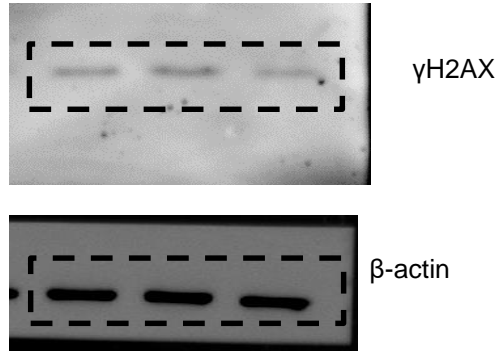

**Fig 4D.**

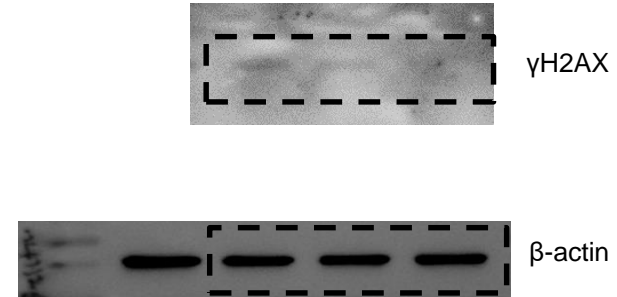

**Fig 5A.**

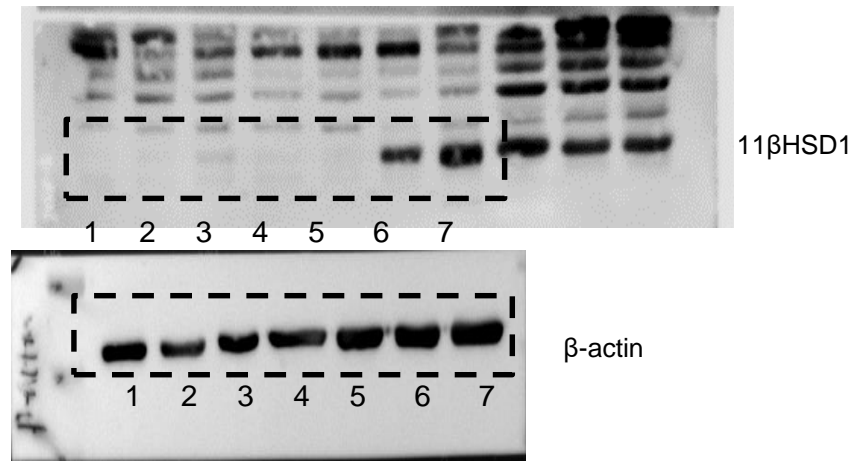

**Fig 5D.**

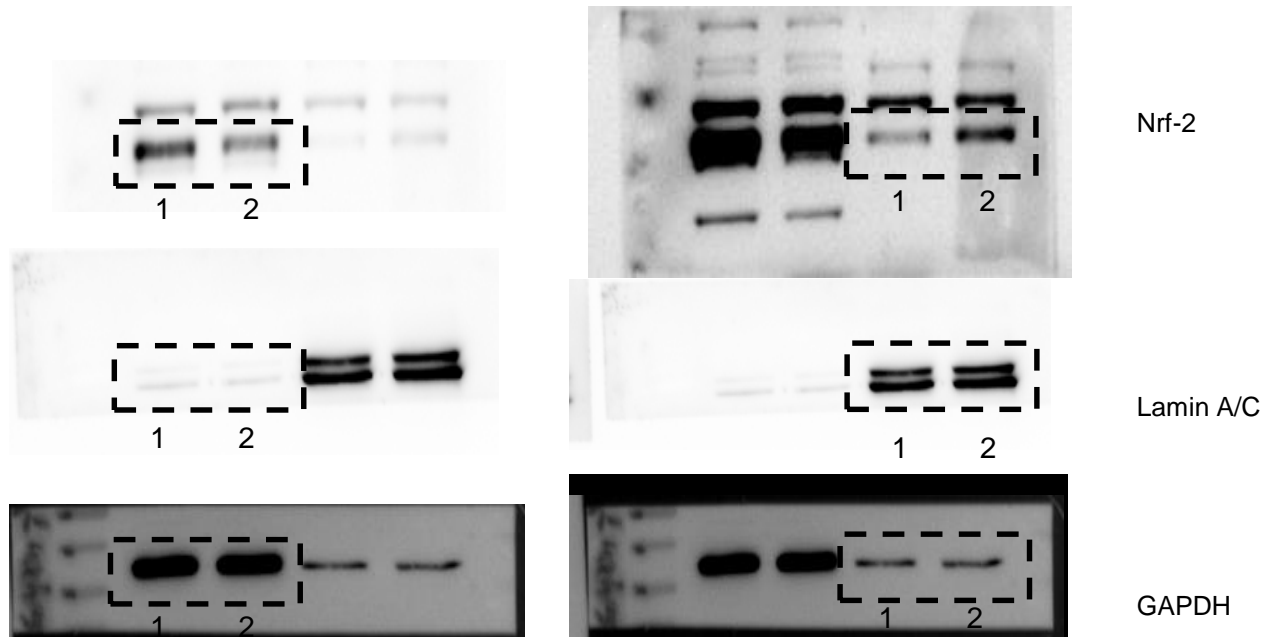



**Fig 5E.**

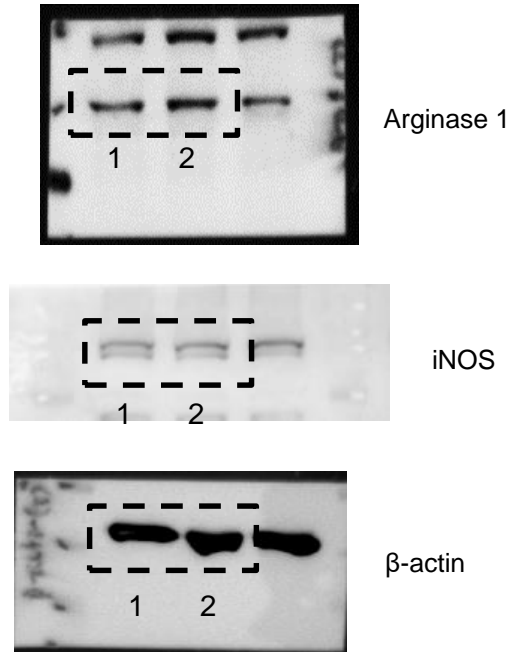

**Fig 5F.**

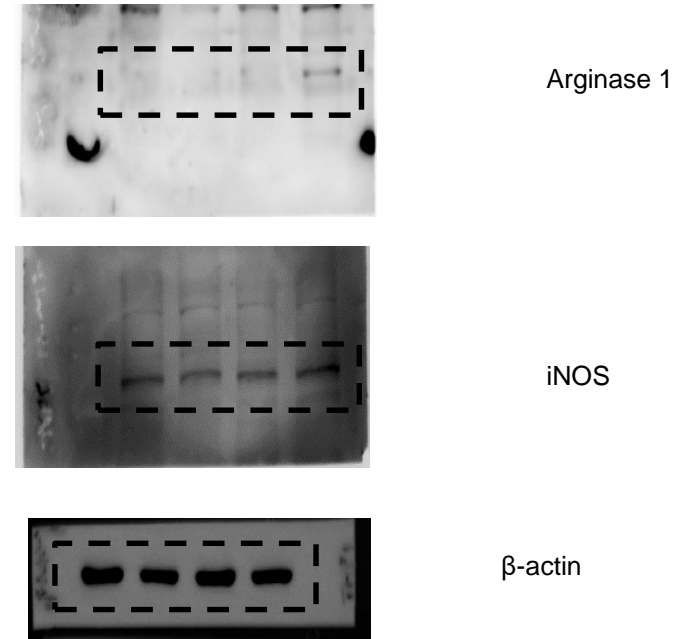

Supplement: MOESM3 [file 41419_2025_7522_MOESM3_ESM.pdf]
